# Supplementary material for: Potentiometric measurement of entropy change for lithium batteries
Source: Royal Society of Chemistry journal article supplement (doi:10.1039/c6cp08505a), 2017-01-01
Supplement: c6cp08505a1.pdf [file c6cp08505a1.pdf]

Electronic supplementary information to manuscript ID CP-ART-12-2016-008505

**"Potentiometric Measurement of Entropy Change for Lithium Batteries"**

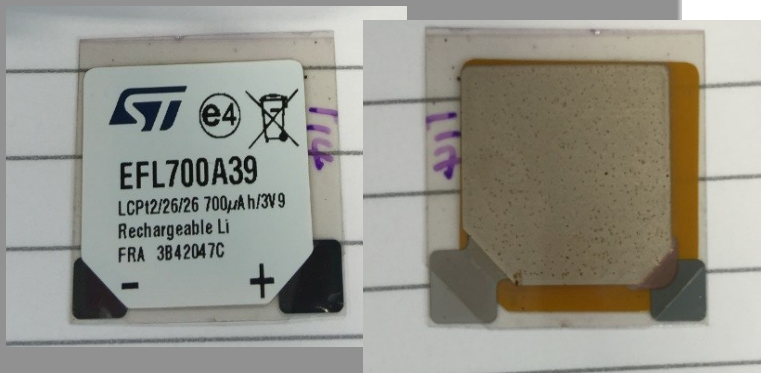

Fig. S1 the appearance of ST cell sample

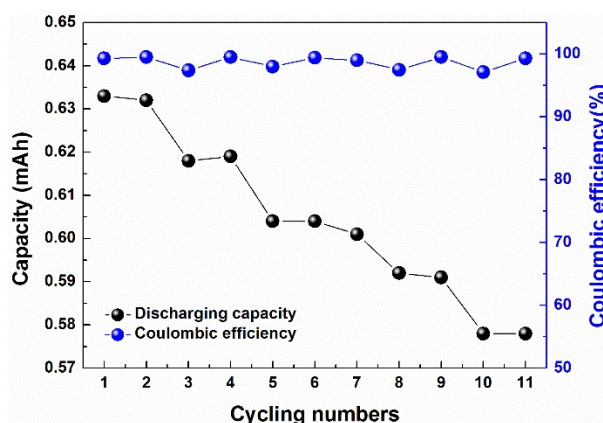

Fig. S2 the discharging capacity and coulombic efficiency of cell cycled in 3.0-4.5V with current of 0.5 mA at 20 °C

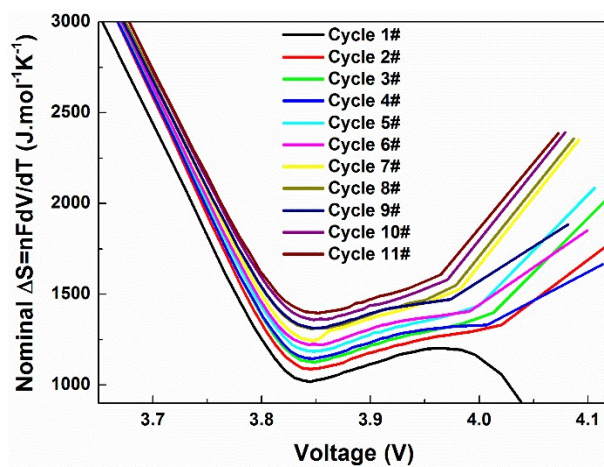

Fig. S3 the nominal  $\Delta S$  obtained by fully continuous measurement as a degradation tracking tool
